# Supplementary material
Source: PubMed Central journal article supplement (PMC6541662)

**Ambio**

Electronic Supplementary Material

*This supplementary material has not been peer reviewed.*

Title: **Probing into farmers' perceptions of a globally endangered ecosystem service provider**

Authors: Marina García-Alfonso, Zebensui Morales-Reyes, Laura Gangoso, Willem Bouten, José A. Sánchez-Zapata, David Serrano and José A. Donázar

**Table S1.** Information about GPS locations used for analyzing the probability of consistency between data of GPS-tagged vultures and farmers' awareness of vulture presence at their farms. PVC: individual identifier. Locations: number of GPS-fixes retained after removing non-stationary locations, i.e. locations with speed higher than 2 m/s and altitude higher than 25 meters. Days: number of days with information on stationary locations. Min date: date of the first location for each individual. Max date: date of the last location for each individual. Locations total: total number of locations, including stationary and non-stationary. Days total: total number of days, including stationary and non-stationary locations.

| <b>PVC</b> | <b>locations</b> | <b>days</b> | <b>min date</b> | <b>max date</b> | <b>locations total</b> | <b>days total</b> |
|------------|------------------|-------------|-----------------|-----------------|------------------------|-------------------|
| 225        | 326726           | 914         | 2013-07-01      | 2015-12-31      | 591679                 | 914               |
| 226        | 325525           | 914         | 2013-07-01      | 2015-12-31      | 578904                 | 914               |
| 228        | 588846           | 914         | 2013-07-01      | 2015-12-31      | 1234537                | 914               |
| 22C        | 375463           | 912         | 2013-07-01      | 2015-12-31      | 632599                 | 912               |
| 22T        | 395452           | 914         | 2013-07-01      | 2015-12-31      | 680585                 | 914               |
| 22W        | 67602            | 137         | 2013-07-01      | 2013-11-14      | 109045                 | 137               |
| 22X        | 378273           | 914         | 2013-07-01      | 2015-12-31      | 720759                 | 914               |
| 237        | 314246           | 912         | 2013-07-01      | 2015-12-31      | 553926                 | 912               |
| 2X1        | 415875           | 914         | 2013-07-01      | 2015-12-31      | 795628                 | 914               |
| 2X2        | 509825           | 912         | 2013-07-01      | 2015-12-31      | 1027161                | 912               |
| 2X3        | 273701           | 844         | 2013-07-01      | 2015-12-30      | 465455                 | 914               |
| 2X4        | 219430           | 914         | 2013-07-01      | 2015-12-31      | 405831                 | 914               |
| 2X5        | 621664           | 905         | 2013-07-01      | 2015-12-31      | 1177793                | 905               |
| 3FC        | 237965           | 914         | 2013-07-01      | 2015-12-31      | 468382                 | 914               |
| 3FF        | 212434           | 893         | 2013-07-01      | 2015-12-31      | 364119                 | 893               |
| 3NP        | 549832           | 791         | 2013-10-23      | 2015-12-31      | 942524                 | 791               |
| 231        | 238637           | 797         | 2013-10-26      | 2015-12-31      | 483968                 | 797               |
| 234        | 66407            | 583         | 2014-05-28      | 2015-12-31      | 141662                 | 583               |
| 371        | 62930            | 583         | 2014-05-28      | 2015-12-31      | 119133                 | 583               |
| 224        | 52736            | 580         | 2014-05-31      | 2015-12-31      | 98786                  | 580               |
| 341        | 66970            | 580         | 2014-05-31      | 2015-12-31      | 116251                 | 580               |
| 2XV        | 43590            | 578         | 2014-06-02      | 2015-12-31      | 65050                  | 578               |
| 2XM        | 24863            | 221         | 2015-05-23      | 2015-12-31      | 45355                  | 221               |
| 3PU        | 22837            | 222         | 2015-05-23      | 2015-12-31      | 43497                  | 222               |

| <b>PVC</b> | <b>locations</b> | <b>days</b> | <b>min date</b> | <b>max date</b> | <b>locations total</b> | <b>days total</b> |
|------------|------------------|-------------|-----------------|-----------------|------------------------|-------------------|
| 3PX        | 20474            | 222         | 2015-05-23      | 2015-12-31      | 39677                  | 222               |
| 2XC        | 26248            | 221         | 2015-05-25      | 2015-12-31      | 47636                  | 221               |
| 3FA        | 19610            | 221         | 2015-05-25      | 2015-12-31      | 45052                  | 221               |
| 221        | 1322             | 89          | 2015-09-16      | 2015-12-31      | 26645                  | 107               |
| 222        | 1030             | 90          | 2015-09-16      | 2015-12-31      | 27837                  | 107               |
| 255        | 719              | 81          | 2015-09-16      | 2015-12-29      | 31135                  | 107               |
| 370        | 1074             | 94          | 2015-09-16      | 2015-12-31      | 28306                  | 107               |
| 3AC        | 797              | 76          | 2015-09-16      | 2015-12-29      | 29090                  | 107               |
| 3XV        | 804              | 100         | 2015-09-16      | 2015-12-31      | 18232                  | 107               |
| 254        | 775              | 87          | 2015-09-17      | 2015-12-31      | 30217                  | 107               |
| 40H        | 686              | 82          | 2015-09-19      | 2015-12-30      | 18245                  | 105               |
| 22M        | 726              | 76          | 2015-09-20      | 2015-12-29      | 21723                  | 104               |
| 22P        | 519              | 74          | 2015-09-20      | 2015-12-31      | 24562                  | 104               |
| 2XX        | 1131             | 84          | 2015-09-20      | 2015-12-31      | 26344                  | 104               |
| 40C        | 569              | 78          | 2015-09-20      | 2015-12-31      | 26482                  | 105               |
| 40F        | 59               | 19          | 2015-09-20      | 2015-11-06      | 3065                   | 56                |
| 20H        | 700              | 79          | 2015-09-22      | 2015-12-31      | 13815                  | 102               |
| 2XJ        | 475              | 59          | 2015-09-22      | 2015-12-30      | 18467                  | 102               |
| 2XL        | 966              | 78          | 2015-09-22      | 2015-12-31      | 23453                  | 102               |
| 257        | 607              | 82          | 2015-09-23      | 2015-12-31      | 28610                  | 101               |
| 3AU        | 705              | 74          | 2015-09-23      | 2015-12-31      | 28954                  | 102               |
| 40J        | 591              | 80          | 2015-09-23      | 2015-12-31      | 12157                  | 102               |

**Table S2.** Demographic information of the surveyed farmers' on Fuerteventura. Surveys evaluated farmers' perception of Canarian Egyptian Vultures and awareness of their presence in their own farms. Position: charge of the farmer in the farm. Sex: sex of the surveyed farmer (Male or Female). N: total number of surveyed farmers. N (GPS analyses): number of surveyed farmers' answers included for comparison with vultures GPS data.

| <b>Position</b> | <b>Sex</b> | <b>Range of age</b> | <b>N</b> | <b>N (GPS analyses)</b> |
|-----------------|------------|---------------------|----------|-------------------------|
| Manager         | M          | < 30                | 2        | 2                       |
| Manager         | M          | 30-40               | 2        | 2                       |
| Owner           | F          | > 60                | 1        | 1                       |
| Owner           | F          | 30-40               | 1        | 1                       |
| Owner           | F          | 40-50               | 4        | 4                       |
| Owner           | F          | 50-60               | 2        | 1                       |
| Owner           | M          | < 30                | 1        | 1                       |
| Owner           | M          | > 60                | 6        | 6                       |
| Owner           | M          | 30-40               | 9        | 8                       |
| Owner           | M          | 40-50               | 10       | 9                       |
| Owner           | M          | 50-60               | 19       | 18                      |
| Shepherd        | M          | 40-50               | 1        | 1                       |
| Shepherd        | M          | 50-60               | 1        | 1                       |

**Table S3.** Variables used to evaluate farmers' perception about Canarian Egyptian vultures on Fuerteventura and to analyze consistency between farmers' awareness of vulture presence and GPS data. Question in surveys column shows question asked to farmers during face-to-face surveys.

| <b>Variable</b>                | <b>Question in surveys</b>                                                                                                                                                                                                      |
|--------------------------------|---------------------------------------------------------------------------------------------------------------------------------------------------------------------------------------------------------------------------------|
| <i>ESP index</i>               | Among the species that you see, could you evaluate how much beneficial or harmful are they for you? Evaluate them between 1 (very harmful) and 5 (very beneficial). Why do you consider each one beneficial or harmful?         |
| <i>Scavenging services (%)</i> | Among the species that you see eating carcasses at your farm, which of them do you think that participate more in removing such carcasses? Could you sort the species according to their importance in the disposal of carrion? |
| <i>Presence</i>                | Do Egyptian vultures visit your farm? Yes No                                                                                                                                                                                    |
| <i>TimeSlots</i>               | What time do Egyptian vultures usually visit your farm?: Morning Midday Afternoon                                                                                                                                               |
| <i>Number</i>                  | How many Egyptian vultures do you usually see in your farm?                                                                                                                                                                     |

**Table S4.** Top-ranked candidate models for the probability of consistency between data of GPS-tagged vultures and farmers' awareness of vulture presence (*Presence*) at their farms. Models selected for model averaging are shown in bold. Models including uninformative parameters and correlated variables were removed. Delta AICc: difference in AICc between each model and the best model (lowest AICc). AICcWt: AICc weights. Cum.Wt: Cumulative weights. Radius: threshold distances around the farms. K: number of parameters. ModelLik: likelihood of each model.

| Model               | AICc          | Delta AICc   | AICcWt       | Cum.Wt       | Variable                                           | K        | ModelLik     |
|---------------------|---------------|--------------|--------------|--------------|----------------------------------------------------|----------|--------------|
| <i>Radius 180 m</i> |               |              |              |              |                                                    |          |              |
| <b>772</b>          | <b>67.645</b> | <b>0</b>     | <b>0.286</b> | <b>0.286</b> | <b>Goat Sheep + Dist Roost + Num days + Gender</b> | <b>5</b> | <b>1</b>     |
| <b>38</b>           | <b>68.613</b> | <b>0.968</b> | <b>0.176</b> | <b>0.462</b> | <b>Goat Sheep + Dist Roost</b>                     | <b>3</b> | <b>0.616</b> |
| 647                 | 69.694        | 2.049        | 0.103        | 0.565        | Goat Sheep + Dist Main AFS + Dist Roost + Num days | 5        | 0.359        |
| 242                 | 69.96         | 2.315        | 0.090        | 0.655        | Goat Sheep + Num days + Gender                     | 4        | 0.314        |
| 108                 | 70.28         | 2.635        | 0.077        | 0.731        | Num days + Gender                                  | 3        | 0.268        |
| 418                 | 70.342        | 2.697        | 0.074        | 0.806        | Dist Roost + Num days + Gender                     | 4        | 0.260        |
| 2                   | 71.799        | 4.154        | 0.036        | 0.841        | Goat Sheep                                         | 2        | 0.125        |
| 40                  | 71.898        | 4.253        | 0.034        | 0.876        | Goat Sheep + Num days                              | 3        | 0.119        |
| 105                 | 72.438        | 4.793        | 0.026        | 0.902        | Dist Roost + Gender                                | 3        | 0.091        |
| 12                  | 72.631        | 4.986        | 0.024        | 0.925        | Dist Roost                                         | 2        | 0.083        |
| 892                 | 72.897        | 5.252        | 0.021        | 0.946        | Dist Main AFS + Dist Roost + Dist Terr + Num days  | 5        | 0.072        |
| 0                   | 72.98         | 5.335        | 0.020        | 0.966        | 1                                                  | 1        | 0.069        |
| 292                 | 73.008        | 5.363        | 0.020        | 0.985        | Dist Main AFS + Dist Roost + Dist Terr             | 4        | 0.068        |
| 293                 | 73.598        | 5.953        | 0.015        | 1            | Dist Main AFS + Dist Roost + Num days              | 4        | 0.051        |
| <i>Radius 393 m</i> |               |              |              |              |                                                    |          |              |
| <b>97</b>           | <b>72.603</b> | <b>0</b>     | <b>0.700</b> | <b>0.700</b> | <b>Num days + Gender</b>                           | <b>3</b> | <b>1</b>     |
| 14                  | 75.140        | 2.537        | 0.197        | 0.897        | Num days                                           | 2        | 0.281        |
| 0                   | 76.842        | 4.239        | 0.084        | 0.981        | 1                                                  | 1        | 0.120        |
| 248                 | 79.792        | 7.189        | 0.019        | 1            | Dist AFS + Dist Roost + Dist Terr                  | 4        | 0.027        |

**Table S5.** Top-ranked candidate models for the probability of consistency between data of GPS-tagged vultures and farmers' awareness of vulture presence in each time slot (*TimeSlots*). Models selected for model averaging are shown in bold. Models including uninformative parameters and correlated variables were removed. Delta AICc: difference in AICc between each model and the best model, (lowest AICc). AICcWt: AICc weights. Cum.Wt: Cumulative weights. Radius: threshold distances around the farms. K: number of parameters. ModelLik: likelihood of each model.

| Model               | AICc          | Delta AICc   | AICcWt       | Cum.Wt       | Variable                                                  | K        | ModelLik     |
|---------------------|---------------|--------------|--------------|--------------|-----------------------------------------------------------|----------|--------------|
| <i>Radius 180 m</i> |               |              |              |              |                                                           |          |              |
| <b>95</b>           | <b>86.51</b>  | <b>0</b>     | <b>0.363</b> | <b>0.363</b> | <b>Max indivs day + Hour + (1 farm ID)</b>                | <b>5</b> | <b>1</b>     |
| <b>263</b>          | <b>87.317</b> | <b>0.808</b> | <b>0.242</b> | <b>0.605</b> | <b>Goat Sheep + Dist Roost + Hour + (1 farm ID)</b>       | <b>6</b> | <b>0.668</b> |
| <b>16</b>           | <b>87.821</b> | <b>1.311</b> | <b>0.188</b> | <b>0.793</b> | <b>Hour + (1 farm ID)</b>                                 | <b>4</b> | <b>0.519</b> |
| 48                  | 89.194        | 2.684        | 0.095        | 0.888        | Dist Main AFS + Max indivs day + (1 farm ID)              | 4        | 0.261        |
| 40                  | 89.909        | 3.399        | 0.066        | 0.954        | Goat Sheep + Dist Roost + (1 farm ID)                     | 4        | 0.183        |
| 0                   | 90.66         | 4.151        | 0.046        | 1            | (1 farm ID)                                               | 2        | 0.126        |
| <i>Radius 393 m</i> |               |              |              |              |                                                           |          |              |
| <b>16</b>           | <b>85.828</b> | <b>0</b>     | <b>0.321</b> | <b>0.321</b> | <b>Hour + (1 farm ID)</b>                                 | <b>4</b> | <b>1</b>     |
| <b>263</b>          | <b>86.033</b> | <b>0.206</b> | <b>0.289</b> | <b>0.610</b> | <b>Goat Sheep + Dist Roost + Hour + (1 farm ID)</b>       | <b>6</b> | <b>0.902</b> |
| <b>525</b>          | <b>86.231</b> | <b>0.404</b> | <b>0.262</b> | <b>0.872</b> | <b>Age + Goat Sheep + Dist Roost + Hour + (1 farm ID)</b> | <b>7</b> | <b>0.817</b> |
| 40                  | 89.814        | 3.986        | 0.044        | 0.916        | Goat Sheep + Dist Roost + (1 farm ID)                     | 4        | 0.136        |
| 0                   | 89.873        | 4.045        | 0.042        | 0.958        | (1 farm ID)                                               | 2        | 0.132        |
| 128                 | 89.916        | 4.088        | 0.042        | 1            | Age + Goat Sheep + Dist Roost + (1 farm ID)               | 5        | 0.129        |

**Figure S1.** Movements of GPS-tagged Canary Egyptian vultures (N= 46) over Fuerteventura used for analyzing the probability of consistency between GPS data and farmers' awareness of vulture presence at their farms.

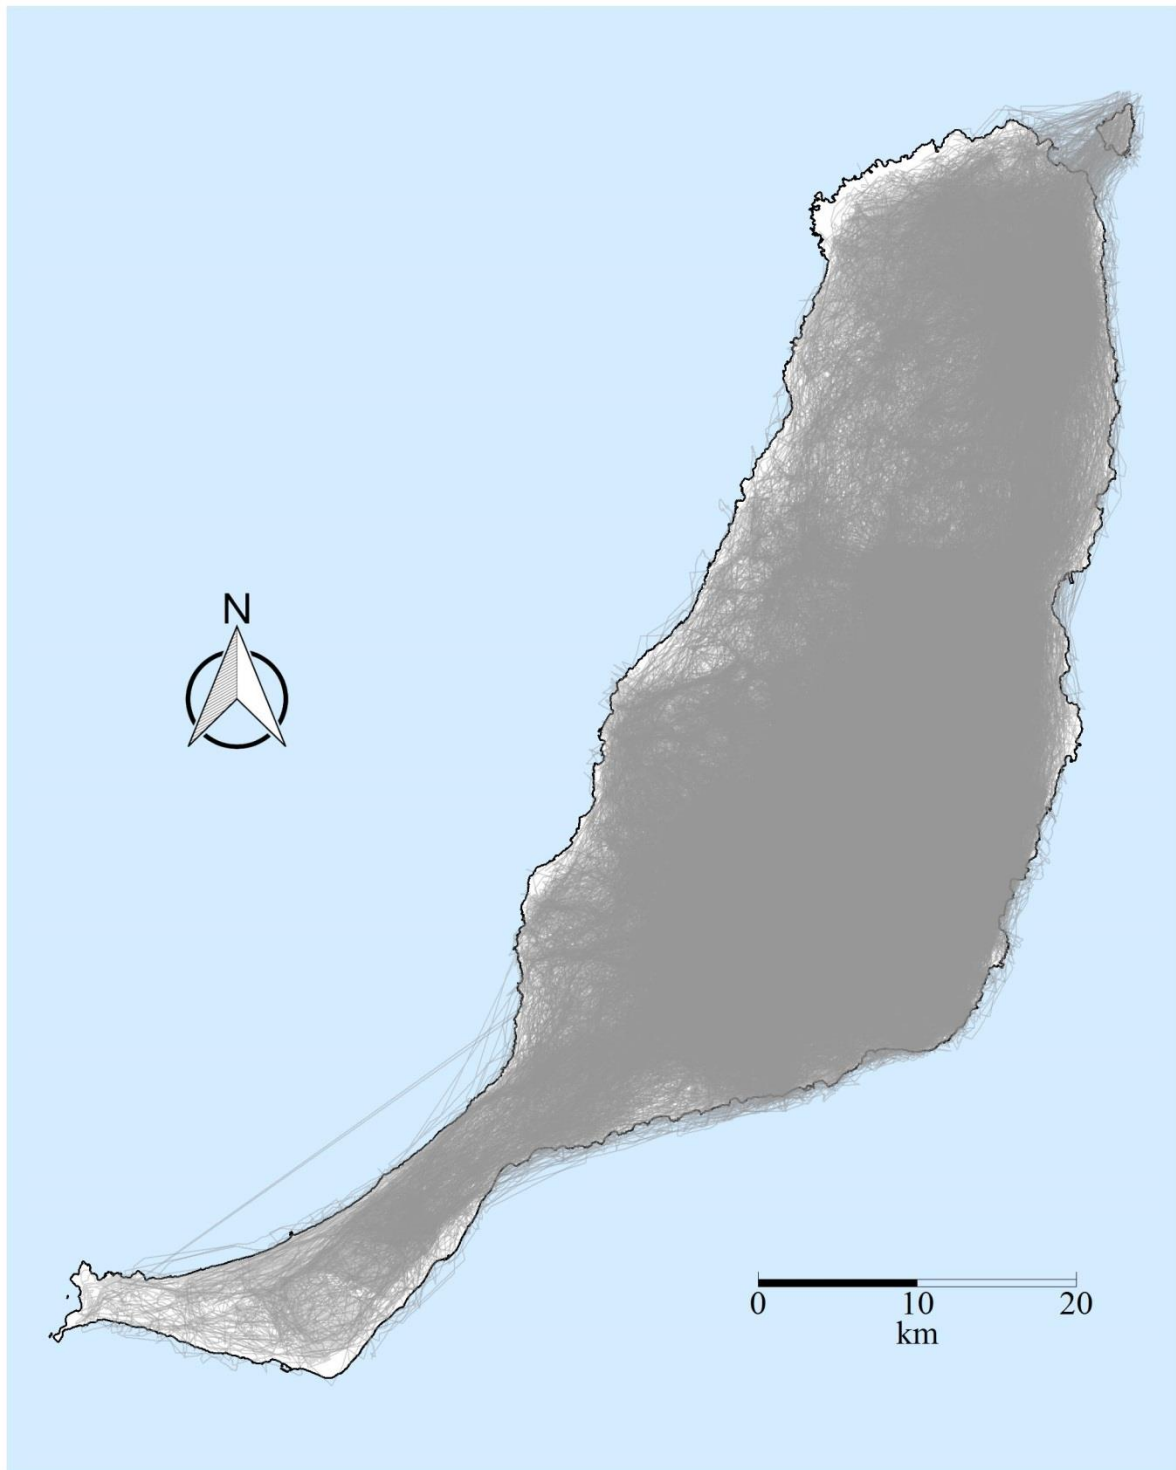

Supplement: 13280_2018_1102_MOESM1_ESM.pdf [file 13280_2018_1102_MOESM1_ESM.pdf]
